# Supplementary material
Source: PubMed Central journal article supplement (PMC8430072)
Supplement: ajtr0013-8787-f7.pdf [file ajtr0013-8787-f7.pdf]

Establishment of a sporadic vestibular schwannoma cell line

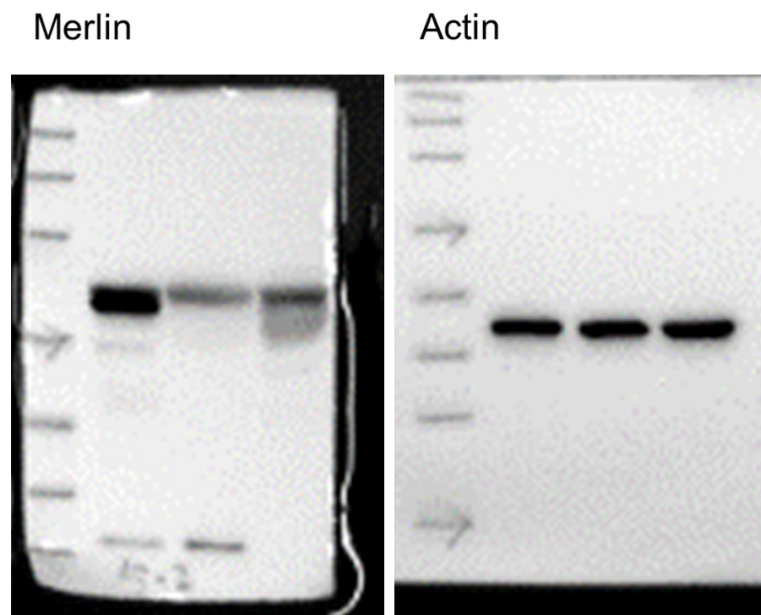

**Figure S1.** Expression of merlin was lower in JEI-001 and HEI-193 than HSC significantly.
